# Supplementary material for: Prostate cancer risk prediction using a polygenic risk score
Source: PubMed Central journal article supplement (PMC7553910; doi:10.1038/s41598-020-74172-z), 2020-10-13
Supplement: 41598_2020_74172_MOESM1_ESM.pdf [file 41598_2020_74172_MOESM1_ESM.pdf]

**Article title: Prostate cancer risk prediction using a polygenic risk score**

**Authors: Csilla Sipeky, Kirsi M Talala, Teuvo L.J. Tammela, Kimmo Taari, Anssi Auvinen,  
Johanna Schleutker**

**Corresponding author contact information:**

Johanna Schleutker, PhD  
Professor of Medical Genetics  
Institute of Biomedicine  
University of Turku  
Kiinamylynkatu 10  
20520 Turku, Finland  
[johanna.schleutker@utu.fi](mailto:johanna.schleutker@utu.fi)  
Tel: +358 29 450 2726

## ***SUPPLEMENTARY MATERIAL***

### **The PRACTICAL Consortium:**

Rosalind Eeles<sup>1,2</sup>, Doug Easton<sup>3</sup>, Zsofia Kote-Jarai<sup>1</sup>, Ali Amin Al Olama<sup>3</sup>, Sara Benlloch<sup>3</sup>, Kenneth Muir<sup>4</sup>, Graham Giles<sup>5,6</sup>, Fredrik Wiklund<sup>7</sup>, Henrik Gronberg<sup>7</sup>, Christopher Haiman<sup>8</sup>, Johanna Schleutker<sup>9,10</sup>, Maren Weischer<sup>11</sup>, Ruth C. Travis<sup>12</sup>, David Neal<sup>13</sup>, Paul Pharoah<sup>14</sup>, Kay-Tee Khaw<sup>15</sup>, Janet L. Stanford<sup>16,17</sup>, William J. Blot<sup>18</sup>, Stephen Thibodeau<sup>19</sup>, Christiane Maier<sup>20,21</sup>, Adam S. Kibel<sup>22,23</sup>, Cezary Cybulski<sup>24</sup>, Lisa Cannon-Albright<sup>25</sup>, Hermann Brenner<sup>26</sup>, Jong Park<sup>27</sup>, Radka Kaneva<sup>28</sup>, Jyotnsa Batra<sup>29</sup>, Manuel R. Teixeira<sup>30</sup>, Hardev Pandha<sup>31</sup>

<sup>1</sup> The Institute of Cancer Research, 15 Cotswold Road, Sutton, Surrey, SM2 5NG, UK, <sup>2</sup> Royal Marsden NHS Foundation Trust, Fulham and Sutton, London and Surrey, UK, <sup>3</sup> Centre for Cancer Genetic Epidemiology, Department of Public Health and Primary Care, University of Cambridge, Strangeways Laboratory, Worts Causeway, Cambridge, UK, <sup>4</sup> University of Warwick, Coventry, UK, <sup>5</sup> Cancer Epidemiology Centre, The Cancer Council Victoria, 1 Rathdowne street, Carlton Victoria, Australia, <sup>6</sup> Centre for Molecular, Environmental, Genetic and Analytic Epidemiology, The University of Melbourne, Victoria, Australia, <sup>7</sup> Department of Medical Epidemiology and Biostatistics, Karolinska Institute, Stockholm, Sweden, <sup>8</sup> Department of Preventive Medicine, Keck School of Medicine, University of Southern California/Norris Comprehensive Cancer Center, Los Angeles, California, USA, <sup>9</sup> Department of Medical Biochemistry and Genetics, University of Turku, Turku, Finland, <sup>10</sup> Institute of Biomedical Technology/BioMediTech, University of Tampere and FimLab Laboratories, Tampere, Finland, <sup>11</sup> Department of Clinical Biochemistry, Herlev Hospital, Copenhagen University Hospital, Herlev Ringvej 75, DK-2730 Herlev, Denmark, <sup>12</sup> Cancer Epidemiology Unit, Nuffield Department of Clinical Medicine, University of Oxford, Oxford, UK, <sup>13</sup> Surgical Oncology (Uro-Oncology: S4), University of Cambridge, Box 279, Addenbrooke's Hospital, Hills Road, Cambridge, UK and Cancer Research UK Cambridge Research Institute, Li Ka Shing Centre, Cambridge, UK, <sup>14</sup> Centre for Cancer Genetic Epidemiology, Department of Oncology, University of Cambridge, Strangeways Laboratory, Worts Causeway, Cambridge, UK, <sup>15</sup> Cambridge Institute of Public Health, University of Cambridge, Forvie Site, Robinson Way, Cambridge CB2 0SR, <sup>16</sup> Division of Public Health Sciences, Fred Hutchinson Cancer Research Center, Seattle, Washington, USA, <sup>17</sup> Department of Epidemiology, School of Public Health, University of Washington, Seattle, Washington, USA, <sup>18</sup> International Epidemiology Institute, 1455 Research Blvd., Suite 550, Rockville, MD 20850, <sup>19</sup> Mayo Clinic, Rochester, Minnesota, USA, <sup>20</sup> Department of Urology, University Hospital Ulm, Germany, <sup>21</sup> Institute of Human Genetics University Hospital Ulm, Germany, <sup>22</sup> Brigham and Women's Hospital/Dana-Farber Cancer Institute, 45 Francis Street-ASB II-3, Boston, MA 02115, <sup>23</sup> Washington University, St Louis, Missouri, <sup>24</sup> International Hereditary Cancer Center, Department of Genetics and Pathology, Pomeranian Medical University, Szczecin, Poland, <sup>25</sup> Division of Genetic Epidemiology, Department of Medicine, University of Utah School of Medicine, <sup>26</sup> Division of Clinical Epidemiology and Aging Research, German Cancer Research Center, Heidelberg Germany, <sup>27</sup> Division of Cancer Prevention and Control, H. Lee Moffitt Cancer Center, 12902 Magnolia Dr., Tampa, Florida, USA, <sup>28</sup> Molecular Medicine Center and Department of Medical Chemistry and Biochemistry, Medical University - Sofia, 2 Zdrave St, 1431, Sofia, Bulgaria, <sup>29</sup> Australian Prostate Cancer Research Centre-Qld, Institute of Health and Biomedical Innovation and Schools of Life Science and Public Health, Queensland University of Technology, Brisbane, Australia, <sup>30</sup> Department of Genetics, Portuguese Oncology Institute, Porto, Portugal and Biomedical Sciences Institute (ICBAS), Porto University, Porto, Portugal, <sup>31</sup> The University of Surrey, Guildford, Surrey, GU2 7XH.

### **Funding for the CRUK study and PRACTICAL consortium:**

This work was supported by the Canadian Institutes of Health Research, European Commission's Seventh Framework Programme grant agreement n° 223175 (HEALTH-F2-2009-223175), Cancer Research UK Grants C5047/A7357, C1287/A10118, C5047/A3354, C5047/A10692, C16913/A6135, and The National Institute of Health (NIH) Cancer Post-Cancer GWAS initiative grant: No. 1 U19 CA 148537-01 (the GAME-ON initiative).

### **COGS acknowledgement:**

This study would not have been possible without the contributions of the following: Per Hall (COGS); Douglas F. Easton, Paul Pharoah, Kyriaki Michailidou, Manjeet K. Bolla, Qin Wang (BCAC), Andrew Berchuck (OCAC), Rosalind A. Eeles, Douglas F. Easton, Ali Amin Al Olama, Zsofia Kote-Jarai, Sara Benlloch (PRACTICAL), Georgia Chenevix-Trench, Antonis Antoniou, Lesley McGuffog, Fergus Couch and Ken Offit (CIMBA), Joe Dennis, Alison M. Dunning, Andrew Lee, and Ed Dicks, Craig Luccarini and the staff of the Centre for Genetic Epidemiology Laboratory, Javier Benitez, Anna Gonzalez-Neira and the staff of the CNIO genotyping unit, Jacques Simard and Daniel C. Tessier, Francois Bacot, Daniel Vincent, Sylvie LaBoissière and Frederic Robidoux and the staff of the McGill University and Génome Québec Innovation Centre, Stig E. Bojesen, Sune F. Nielsen, Borge G. Nordestgaard, and the staff of the Copenhagen DNA laboratory, and Julie M. Cunningham, Sharon A. Windebank, Christopher A. Hilker, Jeffrey Meyer and the staff of Mayo Clinic Genotyping Core Facility

Funding for the iCOGS infrastructure came from: the European Community's Seventh Framework Programme under grant agreement n° 223175 (HEALTH-F2-2009-223175) (COGS), Cancer Research UK (C1287/A10118, C1287/A 10710, C12292/A11174, C1281/A12014, C5047/A8384, C5047/A15007, C5047/A10692), the National Institutes of Health (CA128978) and Post-Cancer GWAS initiative (1U19 CA148537, 1U19 CA148065 and 1U19 CA148112 - the GAME-ON initiative), the Department of Defence (W81XWH-10-1-0341), the Canadian Institutes of Health Research (CIHR) for the CIHR Team in Familial Risks of Breast Cancer, Komen Foundation for the Cure, the Breast Cancer Research Foundation, and the Ovarian Cancer Research Fund.

**Supplementary table 1. Association of age and PSA at diagnosis, Gleason score and stage of prostate cancer with quartile of polygenic risk score**

| <b>Quartile of polygenic risk</b> | <b>Late onset (&gt;55 years, n=2632 (%))</b>         | <b>Early onset (≤55 years, n=106 (%))</b>              | <b>χ<sup>2</sup> (P value)</b> |
|-----------------------------------|------------------------------------------------------|--------------------------------------------------------|--------------------------------|
| Q1                                | 349 (13)                                             | 9 (9)                                                  | 3.15 (0.369)                   |
| Q2                                | 492 (19)                                             | 20 (19)                                                |                                |
| Q3                                | 754 (29)                                             | 28 (26)                                                |                                |
| Q4                                | 1037 (39)                                            | 49 (46)                                                |                                |
|                                   | <b>Low PSA at diagnosis (≤20 ng/mL, n=2099 (%))</b>  | <b>High PSA at diagnosis (&gt;20 ng/mL, n=484 (%))</b> | <b>3.58 (0.311)</b>            |
| Q1                                | 284 (13)                                             | 52 (11)                                                | 3.58 (0.311)                   |
| Q2                                | 396 (19)                                             | 93 (19)                                                |                                |
| Q3                                | 604 (29)                                             | 135 (28)                                               |                                |
| Q4                                | 815 (39)                                             | 204 (42)                                               |                                |
|                                   | <b>Non-aggressive (Gleason score ≤6, n=1320 (%))</b> | <b>Aggressive (Gleason score ≥8, n=368 (%))</b>        | <b>5.37 (0.147)</b>            |
| Q1                                | 168 (13)                                             | 64 (17)                                                | 5.37 (0.147)                   |
| Q2                                | 255 (19)                                             | 69 (19)                                                |                                |
| Q3                                | 377 (29)                                             | 97 (26)                                                |                                |
| Q4                                | 520 (39)                                             | 138 (38)                                               |                                |
|                                   | <b>Localized stage<sup>1</sup> (n=1879 (%))</b>      | <b>Advanced stage<sup>2</sup> (n=602 (%))</b>          | <b>1.41 (0.703)</b>            |
| Q1                                | 251 (13)                                             | 78 (13)                                                | 1.41 (0.703)                   |
| Q2                                | 356 (19)                                             | 106 (18)                                               |                                |
| Q3                                | 544 (29)                                             | 169 (28)                                               |                                |
| Q4                                | 728 (39)                                             | 249 (41)                                               |                                |

p value based on χ<sup>2</sup> test

<sup>1</sup>localized disease is defined as T1-T2, not N1, not M1

<sup>2</sup>advanced disease stage is defined as T3-4, N1, M1

**Supplementary table 2. Prostate cancer susceptibility loci (n=55) included in deriving polygenic risk score**

| Marker     | Locus    | Alleles <sup>a</sup> | EAFF <sup>b</sup> | OR <sup>c</sup> (95% CI) | P <sub>adj</sub> value <sup>d</sup> |
|------------|----------|----------------------|-------------------|--------------------------|-------------------------------------|
| rs16902147 | 8q24.21  | GA                   | 0.07              | 1.86 (1.56-2.23)         | 3.525E-8                            |
| rs79012498 | 8q24.21  | GA                   | 0.08              | 1.81 (1.53-2.15)         | 4.26E-8                             |
| rs7832031  | 8q24.21  | AG                   | 0.22              | 1.49 (1.35-1.65)         | 3.003E-11                           |
| rs2121630  | 8q24.21  | AC                   | 0.16              | 1.49 (1.33-1.67)         | 5.691E-8                            |
| rs10808558 | 8q24.21  | AG                   | 0.23              | 1.48 (1.34-1.63)         | 3.003E-11                           |
| rs4314621  | 8q24.21  | GA                   | 0.23              | 1.48 (1.34-1.63)         | 3.98E-11                            |
| rs7812894  | 8q24.21  | TA                   | 0.23              | 1.48 (1.34-1.63)         | 3.694E-11                           |
| rs13255059 | 8q24.21  | AG                   | 0.22              | 1.47 (1.34-1.63)         | 1.237E-10                           |
| rs9297759  | 8q24.21  | AC                   | 0.22              | 1.46 (1.32-1.61)         | 4.787E-10                           |
| rs11995378 | 8q24.21  | AG                   | 0.22              | 1.45 (1.32-1.60)         | 5.568E-10                           |
| rs7824868  | 8q24.21  | AG                   | 0.22              | 1.45 (1.32-1.60)         | 5.568E-10                           |
| rs4242382  | 8q24.21  | AG                   | 0.22              | 1.45 (1.31-1.60)         | 1.081E-9                            |
| rs4515512  | 8q24.21  | AG                   | 0.22              | 1.45 (1.31-1.60)         | 1.081E-9                            |
| rs7812429  | 8q24.21  | AG                   | 0.22              | 1.45 (1.31-1.60)         | 8.909E-10                           |
| rs7814837  | 8q24.21  | AC                   | 0.22              | 1.45 (1.31-1.60)         | 9.198E-10                           |
| rs10109700 | 8q24.21  | AG                   | 0.23              | 1.42 (1.29-1.56)         | 9.646E-9                            |
| rs4871801  | 8q24.21  | AG                   | 0.23              | 1.42 (1.29-1.56)         | 9.646E-9                            |
| rs4871802  | 8q24.21  | CA                   | 0.23              | 1.42 (1.29-1.56)         | 9.646E-9                            |
| rs6470519  | 8q24.21  | AC                   | 0.23              | 1.42 (1.29-1.56)         | 9.646E-9                            |
| rs7818556  | 8q24.21  | GA                   | 0.23              | 1.42 (1.29-1.56)         | 9.646E-9                            |
| rs1447295  | 8q24.21  | AC                   | 0.23              | 1.41 (1.28-1.55)         | 2.015E-8                            |
| rs4871813  | 8q24.21  | AC                   | 0.22              | 1.41 (1.28-1.55)         | 2.332E-8                            |
| rs6470529  | 8q24.21  | CG                   | 0.22              | 1.41 (1.28-1.55)         | 2.332E-8                            |
| rs9643226  | 8q24.21  | GC                   | 0.23              | 1.41 (1.28-1.55)         | 1.891E-8                            |
| rs1447296  | 8q24.21  | AG                   | 0.23              | 1.40 (1.27-1.55)         | 2.603E-8                            |
| rs1160267  | 8p21.2   | GA                   | 0.53              | 1.38 (1.28-1.50)         | 3.003E-11                           |
| rs1512268  | 8p21.2   | AG                   | 0.53              | 1.38 (1.28-1.50)         | 3.003E-11                           |
| rs995432   | 8p21.2   | GA                   | 0.53              | 1.38 (1.28-1.50)         | 3.003E-11                           |
| rs13256300 | 8p21.2   | AG                   | 0.51              | 1.37 (1.27-1.48)         | 3.003E-11                           |
| rs13256366 | 8p21.2   | AG                   | 0.51              | 1.37 (1.27-1.48)         | 3.003E-11                           |
| rs1398238  | 8p21.2   | CG                   | 0.51              | 1.37 (1.27-1.48)         | 3.003E-11                           |
| rs1398239  | 8p21.2   | CA                   | 0.51              | 1.37 (1.27-1.48)         | 3.003E-11                           |
| rs1398240  | 8p21.2   | CA                   | 0.51              | 1.37 (1.27-1.48)         | 3.003E-11                           |
| rs1512271  | 8p21.2   | AT                   | 0.51              | 1.37 (1.27-1.48)         | 3.003E-11                           |
| rs2315144  | 8p21.2   | CG                   | 0.51              | 1.37 (1.27-1.48)         | 3.003E-11                           |
| rs4872171  | 8p21.2   | AG                   | 0.51              | 1.37 (1.27-1.48)         | 3.003E-11                           |
| rs4872172  | 8p21.2   | AC                   | 0.51              | 1.37 (1.27-1.48)         | 3.003E-11                           |
| rs4872175  | 8p21.2   | AG                   | 0.53              | 1.37 (1.27-1.48)         | 3.003E-11                           |
| rs7830220  | 8p21.2   | GA                   | 0.51              | 1.37 (1.27-1.48)         | 3.172E-11                           |
| rs13265330 | 8p21.2   | GA                   | 0.53              | 1.37 (1.26-1.48)         | 4.39E-11                            |
| rs7013278  | 8q24.21  | AG                   | 0.38              | 1.32 (1.21-1.43)         | 9.387E-8                            |
| rs2005705  | 17q12    | AG                   | 0.31              | 0.76 (0.70-0.82)         | 8.503E-8                            |
| rs10505477 | 8q24.21  | GA                   | 0.46              | 0.74 (0.69-0.80)         | 4.785E-10                           |
| rs12682374 | 8q24.21  | CG                   | 0.45              | 0.74 (0.69-0.80)         | 5.568E-10                           |
| rs10486567 | 7p15.2   | AG                   | 0.23              | 0.74 (0.68-0.81)         | 6.43E-8                             |
| rs67152137 | 7p15.2   | GC                   | 0.23              | 0.74 (0.68-0.81)         | 6.43E-8                             |
| rs7808935  | 7p15.2   | GA                   | 0.23              | 0.74 (0.68-0.81)         | 6.43E-8                             |
| rs6983267  | 8q24.21  | AC                   | 0.43              | 0.73 (0.68-0.79)         | 3.172E-11                           |
| rs1058205  | 19p13.33 | GA                   | 0.12              | 0.67 (0.60-0.75)         | 3.691E-9                            |
| rs2569735  | 19p13.33 | AG                   | 0.11              | 0.67 (0.60-0.75)         | 2.668E-8                            |
| rs2735839  | 19p13.33 | AG                   | 0.11              | 0.67 (0.60-0.75)         | 2.668E-8                            |
| rs174776   | 19p13.33 | AG                   | 0.07              | 0.63 (0.55-0.71)         | 2.307E-8                            |
| rs266878   | 19p13.33 | CG                   | 0.07              | 0.62 (0.54-0.71)         | 2.332E-8                            |
| rs17632542 | 19p13.33 | GA                   | 0.06              | 0.59 (0.51-0.68)         | 3.015E-9                            |
| rs62113212 | 19p13.33 | AG                   | 0.06              | 0.59 (0.51-0.68)         | 2.846E-9                            |

<sup>a</sup>Effect allele/Other allele; <sup>b</sup>Effect allele frequency in cases; <sup>c</sup>Per-allele odds ratio for the effect allele

<sup>d</sup>Adjusted for false discovery rate (FDR) using Benjamini-Hochberg method;
